# Supplementary material for: High-intensity leg cycling alters the molecular response to resistance exercise in the arm muscles
Source: PubMed Central journal article supplement (PMC7979871; doi:10.1038/s41598-021-85733-1), 2021-03-19

## SUPPLEMENTARY INFORMATION

### **High-intensity leg cycling alters the molecular response to resistance exercise in the arm muscles**

Marcus Moberg<sup>1</sup>, William Apró<sup>1,2</sup>, Igor Cervenka<sup>3</sup>, Björn Ekblom<sup>1</sup>, Gerrit van Hall<sup>4,5</sup>, Hans-Christer Holmberg<sup>3</sup>, Jorge L Ruas<sup>3</sup> and Eva Blomstrand<sup>1,3</sup>

<sup>1</sup>Department of Physiology, Nutrition and Biomechanics, Swedish School of Sport and Health Sciences, Stockholm, Sweden. <sup>2</sup>Department of Clinical Science, Intervention and Technology, Karolinska Institutet, Stockholm, Sweden. <sup>3</sup>Department of Physiology and Pharmacology, Karolinska Institutet, Stockholm, Sweden. <sup>4</sup>Department of Biomedical Sciences, Faculty of Health and Medical Sciences, University of Copenhagen, Denmark and <sup>5</sup>Clinical Metabolomics Core Facility, Clinical Biochemistry, Rigshospitalet, Copenhagen, Denmark

#### **Corresponding author:**

Marcus Moberg, PhD

The Swedish School of Sport and Health Sciences

Box 5626, SE-114 86 Stockholm, Sweden

E-mail: [marcus.moberg@gih.se](mailto:marcus.moberg@gih.se)

# SUPPLEMENTARY FIGURE S1

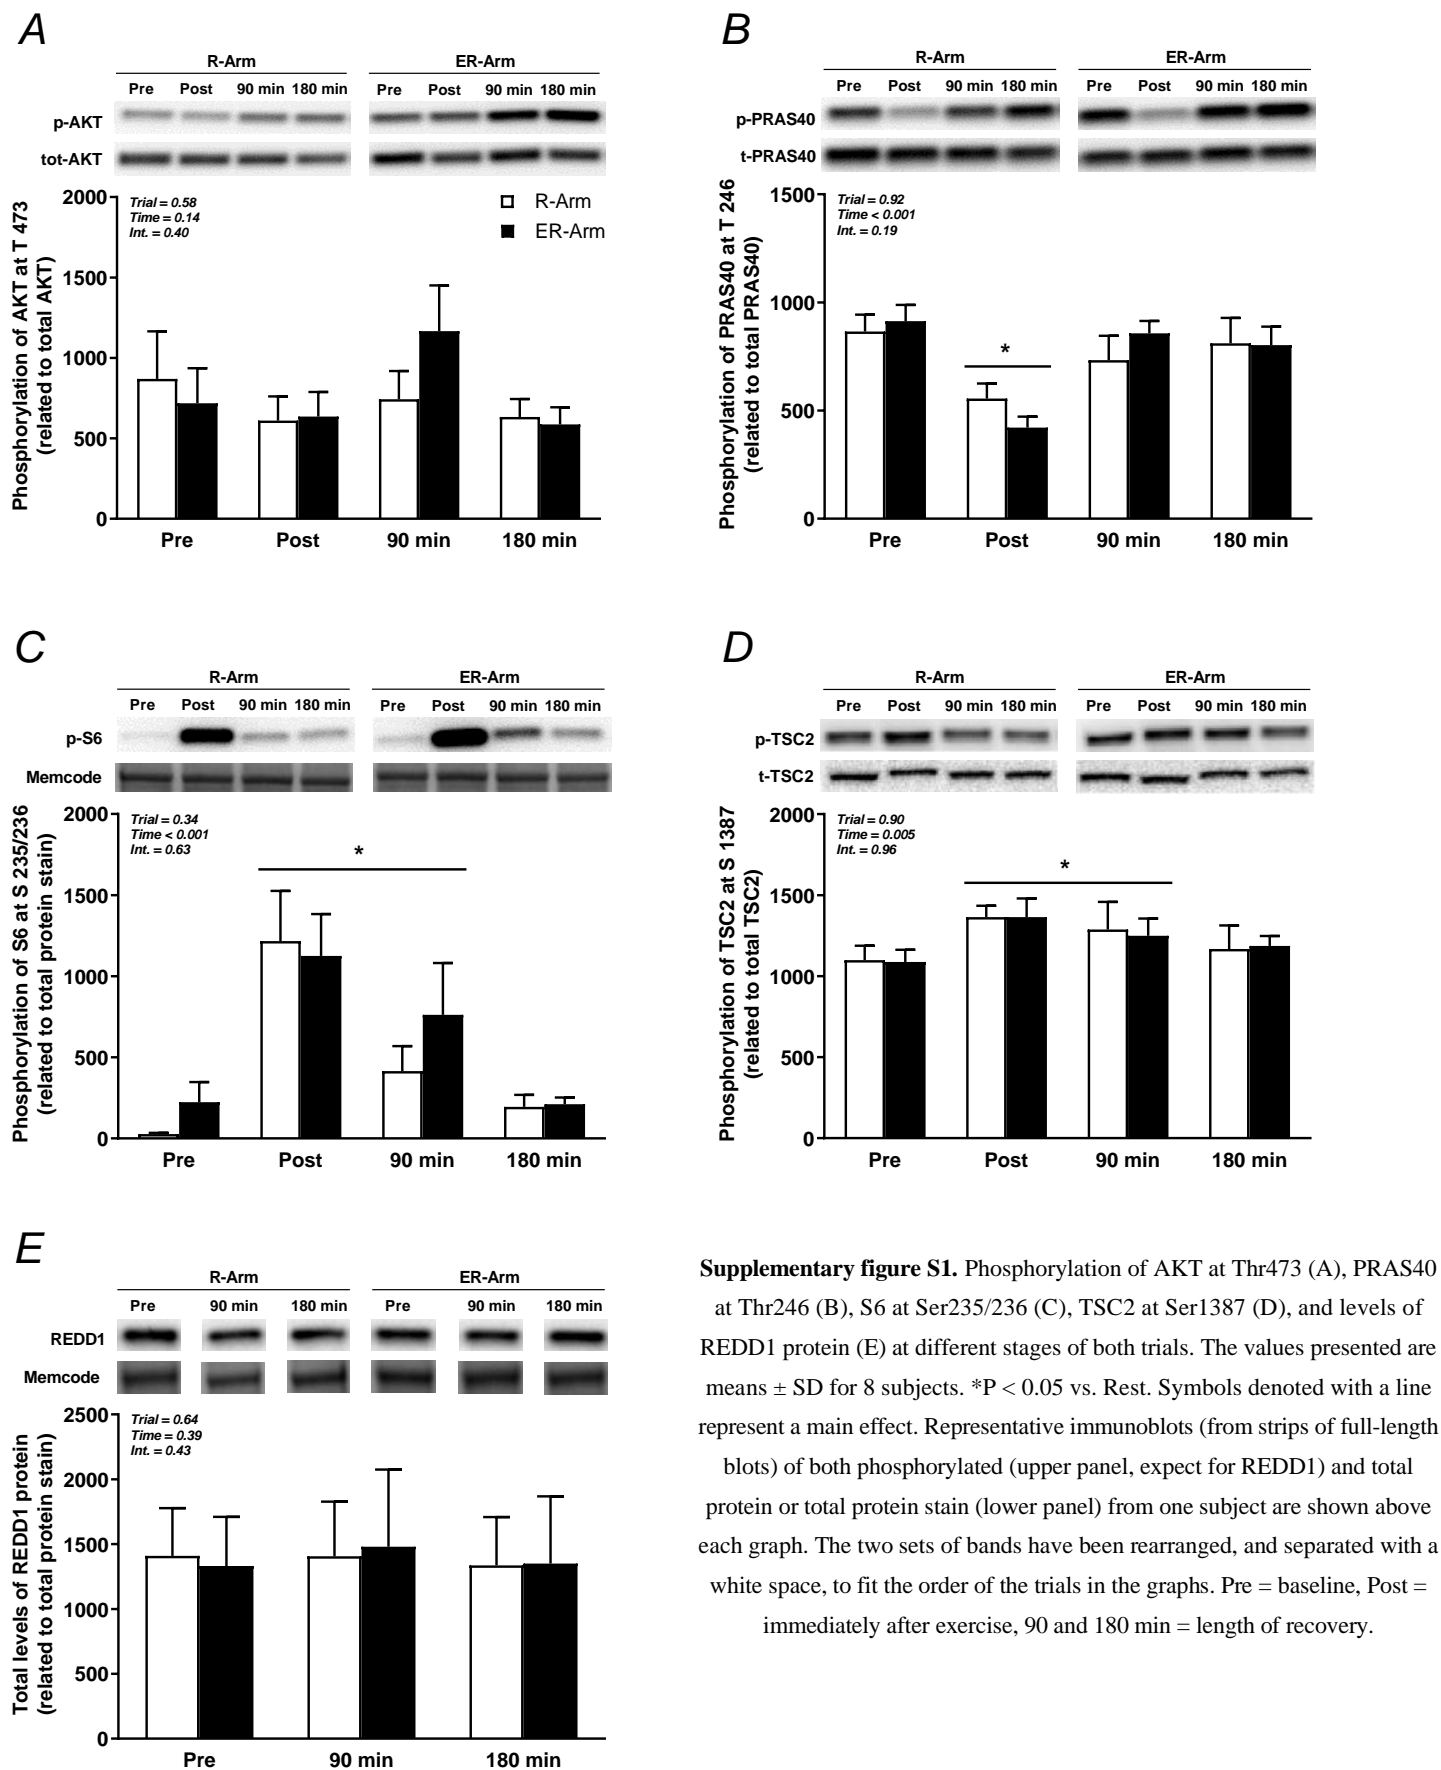

## SUPPLEMENTARY FIGURE S2

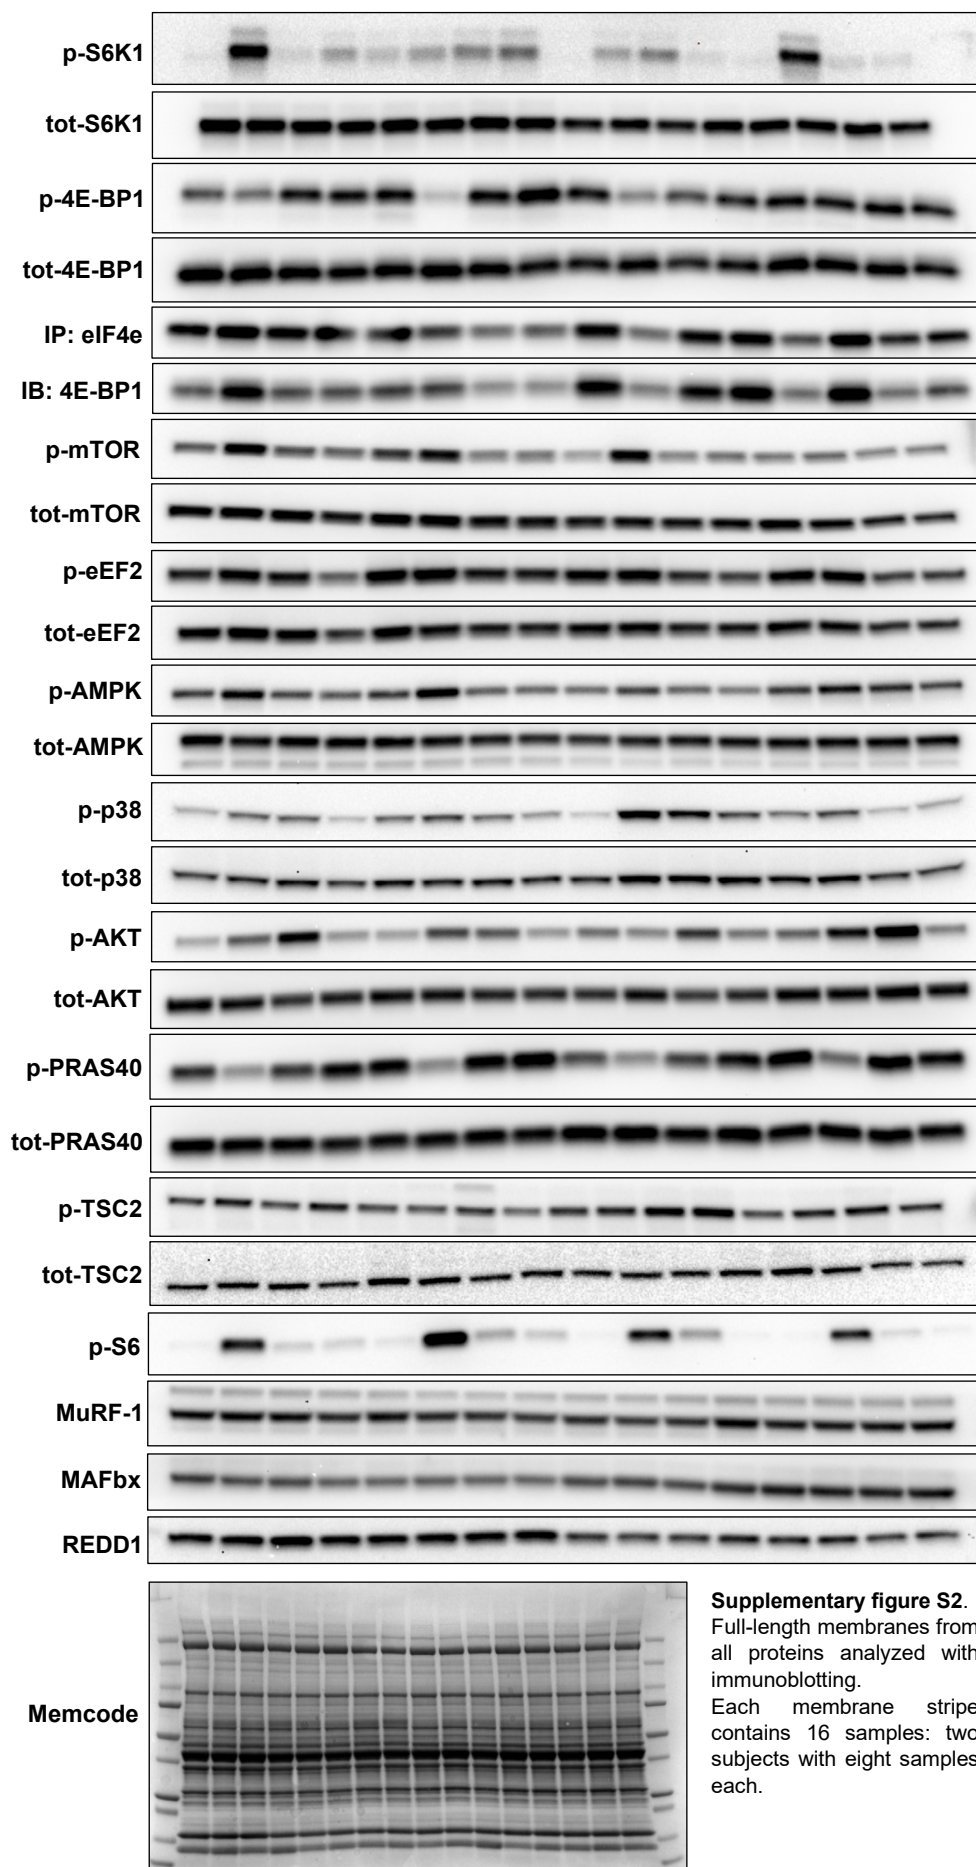

Supplement: 41598_2021_85733_MOESM1_ESM.pdf [file 41598_2021_85733_MOESM1_ESM.pdf]
